# Supplementary material for: Dietary Phytoestrogen Intake is Inversely Associated with Hypertension in a Cohort of Adults Living in the Mediterranean Area
Source: PubMed Central journal article supplement (PMC6017940; doi:10.3390/molecules23020368), 2018-02-09
Supplement: molecules-23-00368-s001.pdf [file molecules-23-00368-s001.pdf]

Supplementary Table 1. Background characteristics by quartiles of dietary phytoestrogens intake in the MEAL study sample separately for men and women.

|                            | Men (n= 804)         |                      |                      |                       | P      | Women (n = 1132)     |                      |                      |                       | P     |
|----------------------------|----------------------|----------------------|----------------------|-----------------------|--------|----------------------|----------------------|----------------------|-----------------------|-------|
|                            | Q1 (median = 257.51) | Q2 (median = 435.15) | Q3 (median = 615.12) | Q4 (median = 1042.52) |        | Q1 (median = 259.66) | Q2 (median = 432.43) | Q3 (median = 599.16) | Q4 (median = 1055.22) |       |
| Educational level, n (%)   |                      |                      |                      |                       | 0.214  |                      |                      |                      |                       | 0.134 |
| Low                        | 51 (20.5)            | 68 (27.3)            | 67 (26.9)            | 63 (25.3)             |        | 110 (24.6)           | 100 (22.3)           | 121 (27.0)           | 117 (26.1)            |       |
| Medium                     | 85 (26.0)            | 99 (30.3)            | 87 (26.6)            | 56 (17.1)             |        | 83 (21.1)            | 96 (24.4)            | 101 (25.7)           | 113 (28.8)            |       |
| High                       | 54 (23.7)            | 57 (25.0)            | 63 (27.6)            | 54 (23.7)             |        | 79 (27.1)            | 75 (25.8)            | 54 (18.6)            | 83 (28.5)             |       |
| Occupational level, n (%)  |                      |                      |                      |                       | 0.042  |                      |                      |                      |                       | 0.065 |
| Unemployed                 | 14 (20.0)            | 11 (15.7)            | 23 (32.9)            | 22 (31.4)             |        | 95 (24.3)            | 74 (18.9)            | 98 (25.1)            | 124 (31.7)            |       |
| Low                        | 31 (22.0)            | 31 (22.0)            | 49 (34.8)            | 30 (21.3)             |        | 20 (16.0)            | 26 (20.8)            | 39 (31.2)            | 40 (32.0)             |       |
| Medium                     | 52 (22.7)            | 67 (29.3)            | 58 (25.3)            | 52 (22.7)             |        | 57 (27.0)            | 52 (24.6)            | 55 (26.1)            | 47 (22.3)             |       |
| High                       | 70 (28.8)            | 60 (24.7)            | 74 (30.5)            | 39 (16.0)             |        | 61 (24.6)            | 65 (26.2)            | 57 (23.0)            | 65 (26.2)             |       |
| Smoking status, n (%)      |                      |                      |                      |                       | 0.386  |                      |                      |                      |                       | 0.200 |
| Non smoker                 | 98 (22.2)            | 120 (27.1)           | 116 (26.2)           | 108 (24.4)            |        | 172 (22.8)           | 176 (23.4)           | 185 (24.6)           | 220 (29.2)            |       |
| Ex smoker                  | 48 (25.8)            | 50 (26.9)            | 51 (27.4)            | 37 (19.9)             |        | 73 (26.2)            | 71 (25.4)            | 60 (21.5)            | 75 (56.9)             |       |
| Current smoker             | 44 (25.0)            | 54 (30.7)            | 50 (28.4)            | 28 (15.9)             |        | 27 (27.0)            | 24 (24.0)            | 31 (31.0)            | 18 (18.0)             |       |
| Physical activity, n (%)   |                      |                      |                      |                       | <0.001 |                      |                      |                      |                       | 0.056 |
| Low                        | 32 (31.4)            | 15 (14.7)            | 18 (17.6)            | 37 (36.3)             |        | 57 (25.1)            | 40 (17.6)            | 65 (28.6)            | 65 (28.6)             |       |
| Medium                     | 97 (28.7)            | 106 (31.4)           | 61 (18.0)            | 74 (21.9)             |        | 124 (23.9)           | 132 (25.5)           | 114 (22.0)           | 148 (28.6)            |       |
| High                       | 48 (16.8)            | 85 (29.8)            | 108 (37.9)           | 44 (15.4)             |        | 49 (19.0)            | 74 (28.7)            | 57 (22.1)            | 78 (30.2)             |       |
| Alcohol consumption, n (%) |                      |                      |                      |                       | <0.001 |                      |                      |                      |                       | 0.003 |
| No                         | 34 (26.2)            | 40 (30.8)            | 27 (20.8)            | 29 (22.3)             |        | 63 (25.8)            | 55 (22.2)            | 57 (23.4)            | 69 (28.3)             |       |
| Moderate (<12 g/d)         | 135 (26.3)           | 141 (27.5)           | 150 (29.2)           | 87 (17.0)             |        | 176 (25.4)           | 162 (23.4)           | 184 (26.6)           | 171 (24.7)            |       |
| Regular (≥12 g/d)          | 21 (13.0)            | 43 (26.7)            | 40 (24.8)            | 57 (35.4)             |        | 33 (16.9)            | 54 (27.7)            | 35 (17.9)            | 73 (37.4)             |       |
| Age group, mean (SD)       | 47.34 (19.66)        | 50.36 (17.31)        | 48.24 (16.49)        | 47.71 (16.91)         | 0.294  | 48.42 (18.14)        | 48.76 (17.24)        | 50.61 (18.39)        | 46.28 (16.67)         | 0.030 |

|               |                      |                      |                      |                      |        |                     |                      |                      |                      |        |
|---------------|----------------------|----------------------|----------------------|----------------------|--------|---------------------|----------------------|----------------------|----------------------|--------|
| Na, mean (SD) | 2914.87<br>(1353.70) | 2804.82<br>(1067.79) | 2910.89<br>(1071.51) | 2872.13<br>(1130.85) | 0.741  | 2591.69<br>(975.16) | 2923.7<br>(1026.16)  | 2839.79<br>(1052.73) | 2990.62<br>(1157.25) | <0.001 |
| K, mean (SD)  | 2930.31<br>(938.07)  | 3241.38<br>(848.24)  | 4061.96<br>(981.13)  | 4429.11<br>(1614.08) | <0.001 | 2913.60<br>(868.95) | 3292.93<br>(1012.53) | 3802.09<br>(1120.00) | 4682.53<br>(1898.02) | <0.001 |

---

Supplementary Table 2. Association between quartiles of dietary phytoestrogens intake (total and main classes) and hypertension in men and women.

|                      | Men, OR (95% CI) |                      |                      |                      | Women, OR (95% CI) |                      |                      |                      |
|----------------------|------------------|----------------------|----------------------|----------------------|--------------------|----------------------|----------------------|----------------------|
|                      | Q1               | Q2                   | Q3                   | Q4                   | Q1                 | Q2                   | Q3                   | Q4                   |
| Total phytoestrogens |                  |                      |                      |                      |                    |                      |                      |                      |
| No. of cases         | 113              | 127                  | 132                  | 90                   | 134                | 133                  | 125                  | 122                  |
| Model <sup>a</sup>   | 1                | 0.72<br>(0.47, 1.11) | 0.91<br>(0.57, 1.46) | 0.72<br>(0.42, 1.21) | 1                  | 0.98<br>(0.64, 1.49) | 0.58<br>(0.37, 0.91) | 0.71<br>(0.44, 1.13) |
| Model <sup>b</sup>   | 1                | 0.80<br>(0.47, 1.37) | 0.73<br>(0.41, 1.30) | 0.65<br>(0.34, 1.25) | 1                  | 1.10<br>(0.64, 1.87) | 0.59<br>(0.34, 1.01) | 0.73<br>(0.42, 1.27) |
| Isoflavones          |                  |                      |                      |                      |                    |                      |                      |                      |
| No. of cases         | 96               | 132                  | 137                  | 97                   | 144                | 135                  | 128                  | 107                  |
| Model <sup>a</sup>   | 1                | 1.22<br>(0.79, 1.90) | 1.09<br>(0.70, 1.70) | 1.36<br>(0.81, 2.28) | 1                  | 0.75<br>(0.49, 1.13) | 0.68<br>(0.45, 1.04) | 0.73<br>(0.46, 1.15) |
| Model <sup>b</sup>   | 1                | 1.06<br>(0.62, 1.80) | 1.04<br>(0.59, 1.83) | 1.46<br>(0.77, 2.77) | 1                  | 0.61<br>(0.36, 1.03) | 0.88<br>(0.54, 1.46) | 0.74<br>(0.45, 1.24) |
| Daidzein             |                  |                      |                      |                      |                    |                      |                      |                      |
| Model <sup>a</sup>   | 1                | 1.17<br>(0.75, 1.83) | 1.17<br>(0.74, 1.84) | 1.11<br>(0.67, 1.84) | 1                  | 1.07<br>(0.70, 1.63) | 0.89<br>(0.57, 1.37) | 0.83<br>(0.53, 1.30) |
| Model <sup>b</sup>   | 1                | 0.89<br>(0.52, 1.52) | 0.91<br>(0.51, 1.61) | 1.36<br>(0.71, 2.59) | 1                  | 1.04<br>(0.62, 1.75) | 1.26<br>(0.75, 2.12) | 0.98<br>(0.58, 1.66) |
| Genistein            |                  |                      |                      |                      |                    |                      |                      |                      |
| Model <sup>a</sup>   | 1                | 1.29<br>(0.83, 2.00) | 1.28<br>(0.80, 2.03) | 1.13<br>(0.69, 1.85) | 1                  | 1.10<br>(0.72, 1.66) | 0.83<br>(0.53, 1.29) | 0.88<br>(0.57, 1.38) |
| Model <sup>b</sup>   | 1                | 1.01<br>(0.60, 1.72) | 1.02<br>(0.57, 1.82) | 1.34<br>(0.71, 2.51) | 1                  | 1.06<br>(0.64, 1.77) | 1.16<br>(0.68, 1.98) | 1.02<br>(0.61, 1.72) |
| Biochanin A          |                  |                      |                      |                      |                    |                      |                      |                      |
| Model <sup>a</sup>   | 1                | 0.88<br>(0.53, 1.47) | 1.36<br>(0.83, 2.23) | 0.59<br>(0.36, 0.96) | 1                  | 1.01<br>(0.66, 1.53) | 0.97<br>(0.63, 1.48) | 0.50<br>(0.32, 0.80) |
| Model <sup>b</sup>   | 1                | 0.76<br>(0.38, 1.50) | 1.05<br>(0.54, 2.04) | 0.61<br>(0.31, 1.20) | 1                  | 1.28<br>(0.74, 2.21) | 1.00<br>(0.57, 1.77) | 0.61<br>(0.33, 1.12) |
| Lignans              |                  |                      |                      |                      |                    |                      |                      |                      |
| No. of cases         | 103              | 105                  | 147                  | 107                  | 122                | 127                  | 128                  | 137                  |
| Model <sup>a</sup>   | 1                | 0.53<br>(0.33, 0.85) | 1.23<br>(0.77, 1.96) | 0.70<br>(0.41, 1.20) | 1                  | 0.80<br>(0.52, 1.22) | 0.85<br>(0.54, 1.34) | 0.78<br>(0.49, 1.25) |
| Model <sup>b</sup>   | 1                | 0.48<br>(0.27, 0.86) | 0.83<br>(0.48, 1.45) | 0.63<br>(0.32, 1.22) | 1                  | 0.80<br>(0.47, 1.36) | 0.82<br>(0.48, 1.41) | 0.76<br>(0.43, 1.33) |
| Lariciresinol        |                  |                      |                      |                      |                    |                      |                      |                      |
| Model <sup>a</sup>   | 1                | 0.71<br>(0.45, 1.11) | 1.48<br>(0.94, 2.34) | 0.82<br>(0.49, 1.38) | 1                  | 0.59<br>(0.39, 0.90) | 0.59<br>(0.37, 0.92) | 0.71<br>(0.44, 1.13) |

|                      |   |                         |                         |                         |   |                         |                         |                         |
|----------------------|---|-------------------------|-------------------------|-------------------------|---|-------------------------|-------------------------|-------------------------|
| Model <sup>b</sup>   | 1 | 0.65<br>(0.37,<br>1.14) | 1.02<br>(0.59,<br>1.77) | 0.74<br>(0.38,<br>1.41) | 1 | 0.60<br>(0.35,<br>1.02) | 0.65<br>(0.38,<br>1.10) | 0.62<br>(0.36,<br>1.09) |
| Matairesinol         |   |                         |                         |                         |   |                         |                         |                         |
| Model <sup>a</sup>   | 1 | 0.98<br>(0.62,<br>1.54) | 2.05<br>(1.28,<br>3.30) | 1.08<br>(0.64,<br>1.82) | 1 | 0.95<br>(0.62,<br>1.45) | 0.81<br>(0.51,<br>1.28) | 0.88<br>(0.54,<br>1.41) |
| Model <sup>b</sup>   | 1 | 0.83<br>(0.48,<br>1.45) | 1.29<br>(0.74,<br>2.30) | 0.86<br>(0.44,<br>1.66) | 1 | 1.12<br>(0.66,<br>1.91) | 0.89<br>(0.51,<br>1.54) | 0.93<br>(0.52,<br>1.65) |
| Pinoresinol          |   |                         |                         |                         |   |                         |                         |                         |
| Model <sup>a</sup>   | 1 | 0.48<br>(0.30,<br>0.76) | 0.87<br>(0.54,<br>1.41) | 0.59<br>(0.35,<br>1.01) | 1 | 0.77<br>(0.50,<br>1.17) | 0.84<br>(0.54,<br>1.32) | 0.64<br>(0.40,<br>1.02) |
| Model <sup>b</sup>   | 1 | 0.40<br>(0.22,<br>0.72) | 0.60<br>(0.33,<br>1.08) | 0.47<br>(0.23,<br>0.93) | 1 | 0.90<br>(0.53,<br>1.53) | 0.88<br>(0.51,<br>1.51) | 0.63<br>(0.35,<br>1.13) |
| Secoisolariciresinol |   |                         |                         |                         |   |                         |                         |                         |
| Model <sup>a</sup>   | 1 | 0.86<br>(0.55,<br>1.34) | 1.12<br>(0.70,<br>1.80) | 0.76<br>(0.44,<br>1.31) | 1 | 0.70<br>(0.45,<br>1.07) | 0.92<br>(0.58,<br>1.47) | 0.81<br>(0.50,<br>1.34) |
| Model <sup>b</sup>   | 1 | 0.77<br>(0.44,<br>1.35) | 0.73<br>(0.41,<br>1.29) | 0.58<br>(0.29,<br>1.15) | 1 | 0.80<br>(0.46,<br>1.36) | 0.99<br>(0.56,<br>1.75) | 0.78<br>(0.43,<br>1.43) |

<sup>a</sup> Model adjusted for age (years, continuous), energy intake (kcal/d, continuous), sodium and potassium intake.

<sup>b</sup> Model adjusted for age (years, continuous), energy intake (kcal/d, continuous), smoking status (smokers, ex-smokers, non-smokers), alcohol consumption (0 g/d, <12 g/d, ≥12 g/d), physical activity level (low, medium, high), educational level (low, medium, high), occupational level (unemployed, low, medium, high), sodium and potassium intake.
